# Supplementary material
Source: PubMed Central journal article supplement (PMC2765785)
Supplement: NIHMS131191-supplement-01.pdf [file NIHMS131191-supplement-01.pdf]

**A**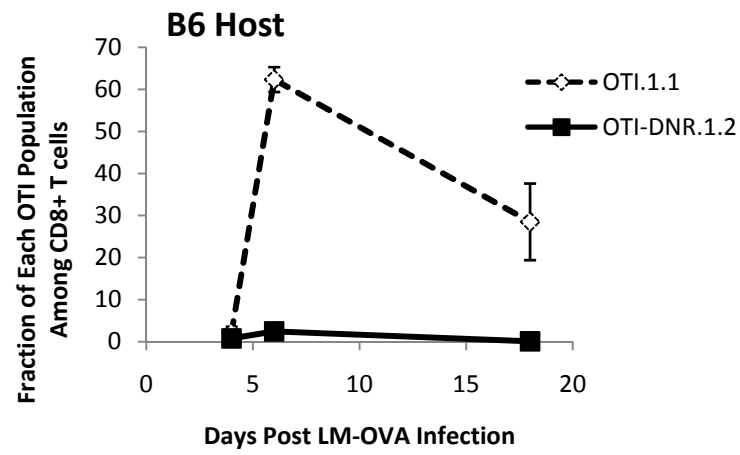**B**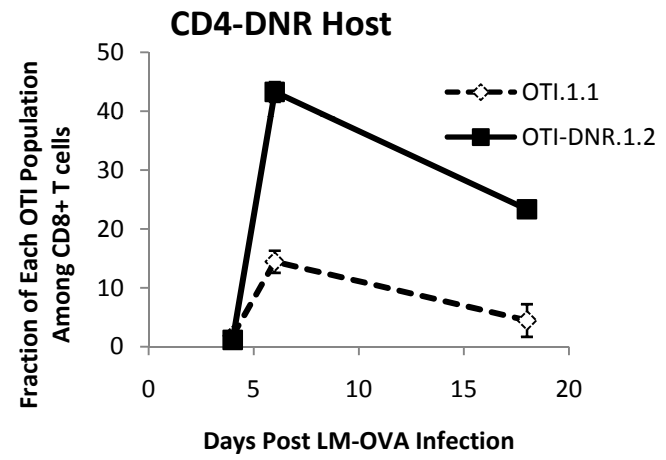

Supplementary Figure 1. DNR transgene-positive cells are rejected in C57BI6 mice.

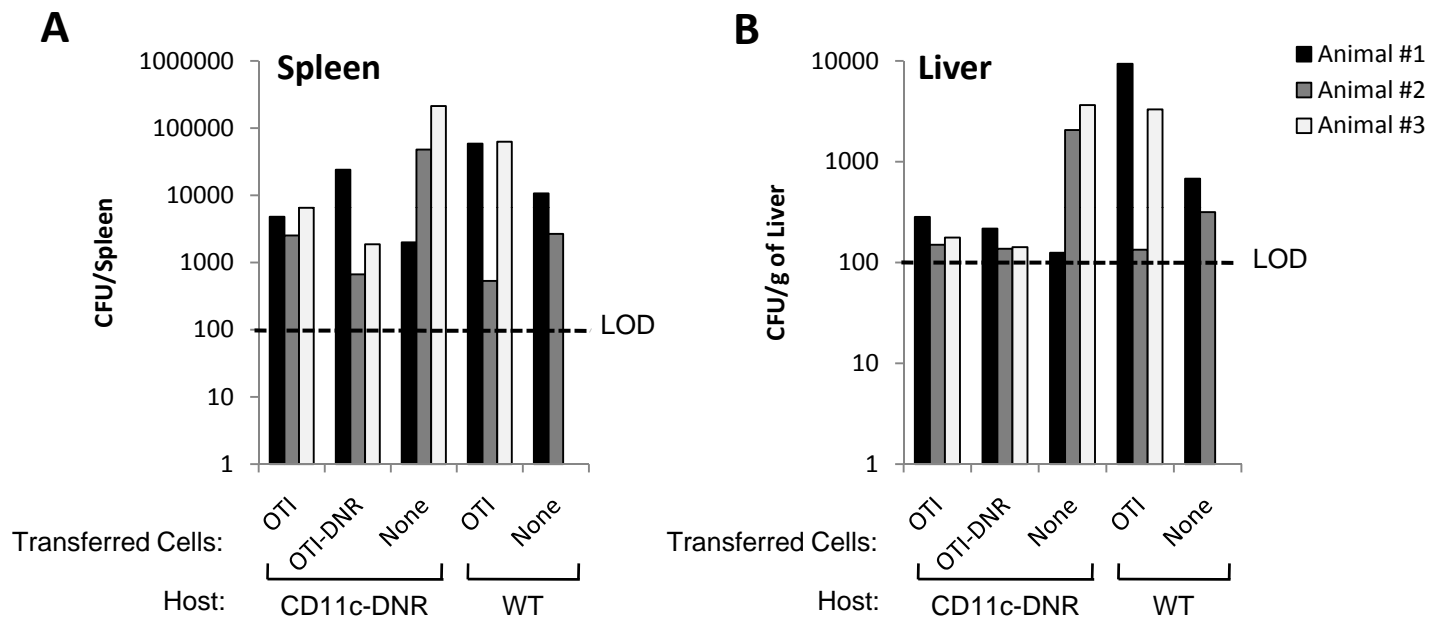

Supplementary Figure 2. Listeria burden in WT vs CD11c-DNR mice 3 days post infection.

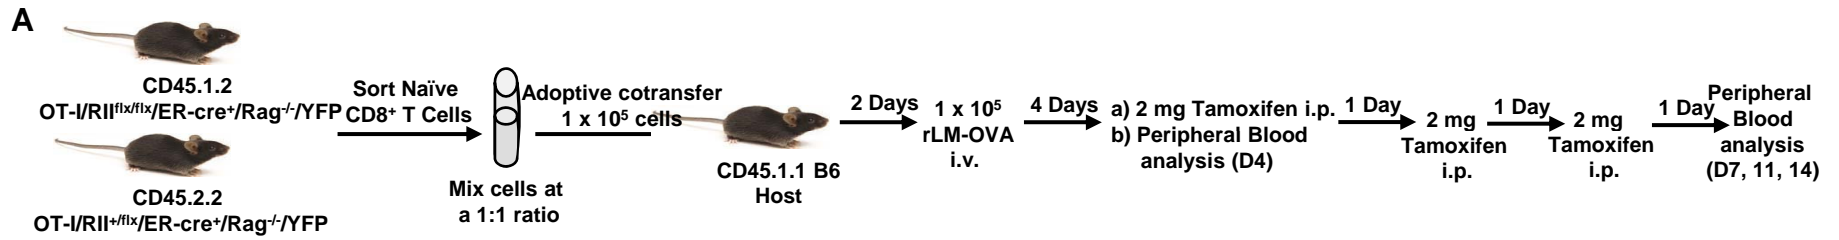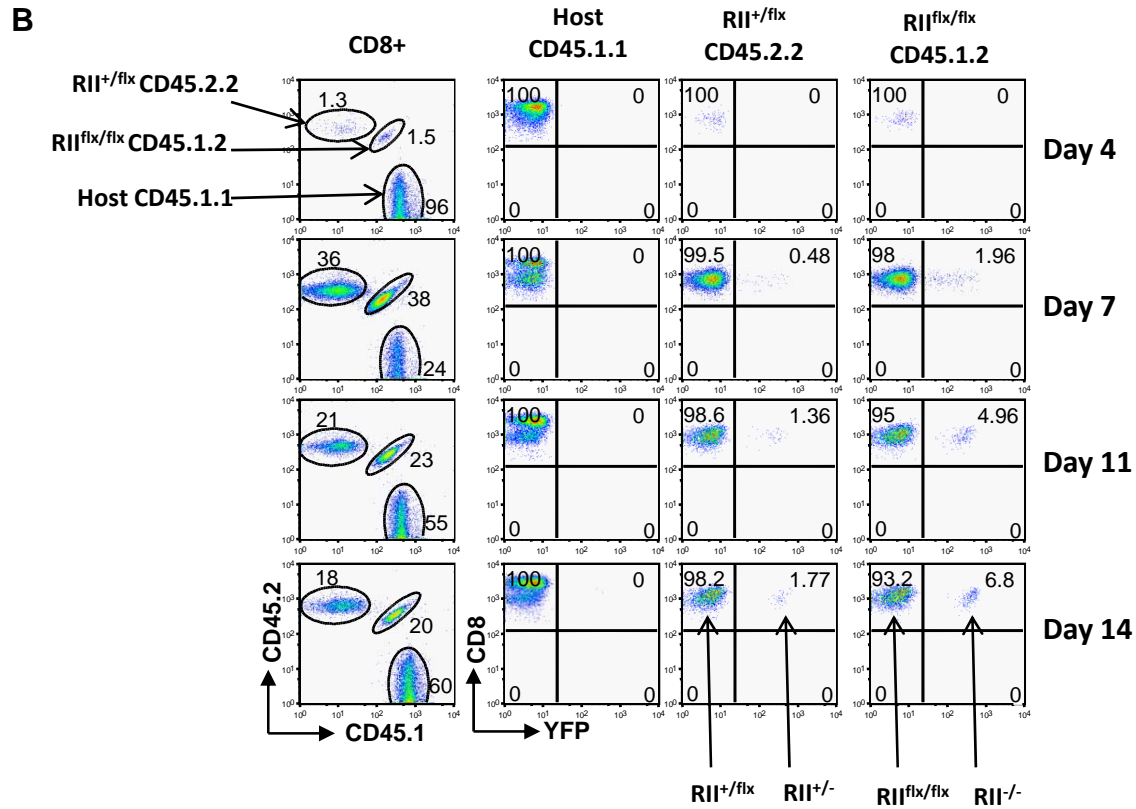

**Supplementary Figure 3. Temporal deletion of TGF- $\beta$ RII after T cell priming and activation results in a 3-fold increase in the frequency of TGF- $\beta$ RII<sup>-/-</sup> OTI effector CD8<sup>+</sup> T cells.**

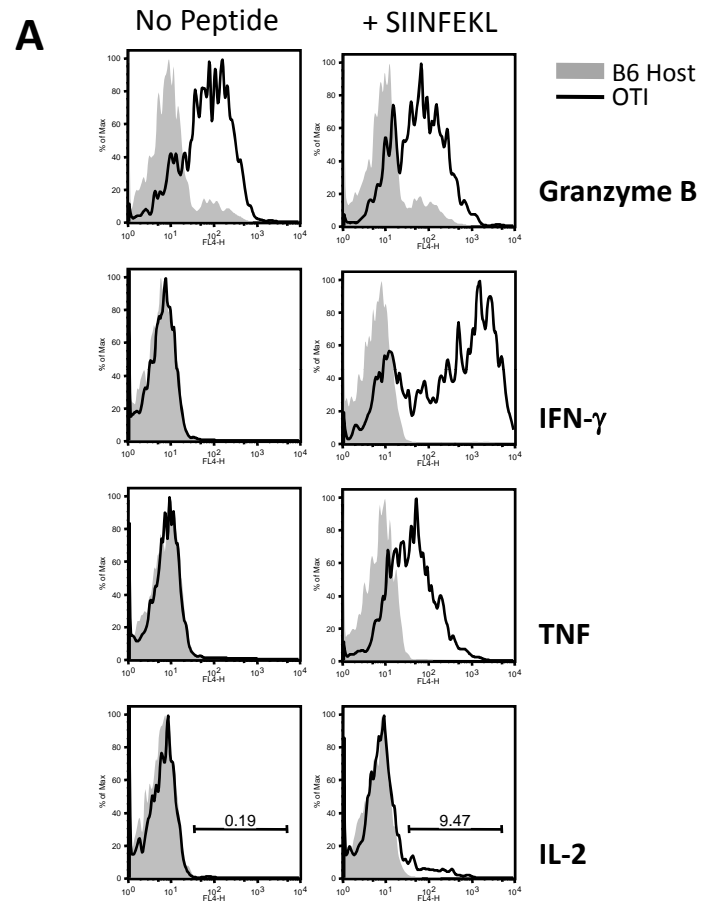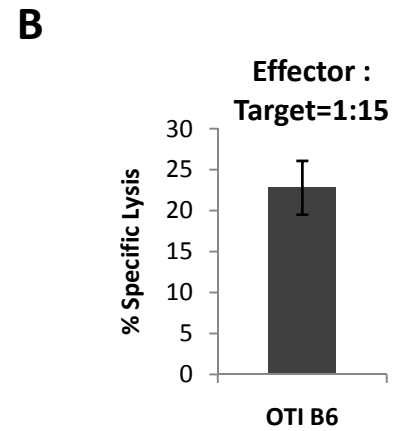

Supplementary Figure 4. Cytokine production and cytolytic activity of OTI cells in B6 host.

**A**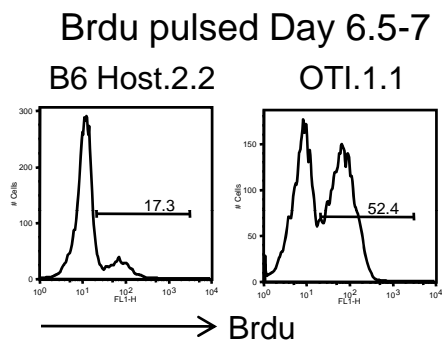**B**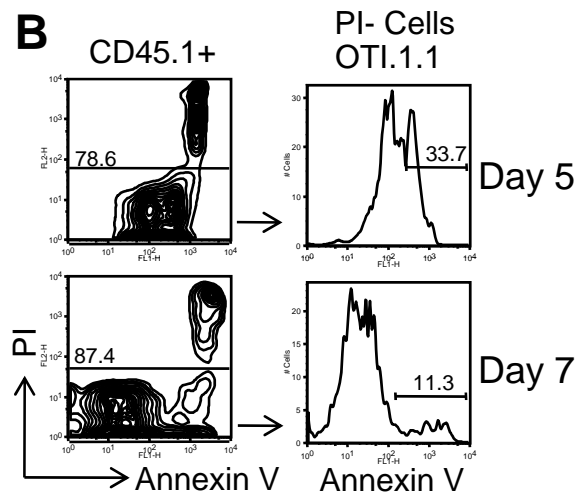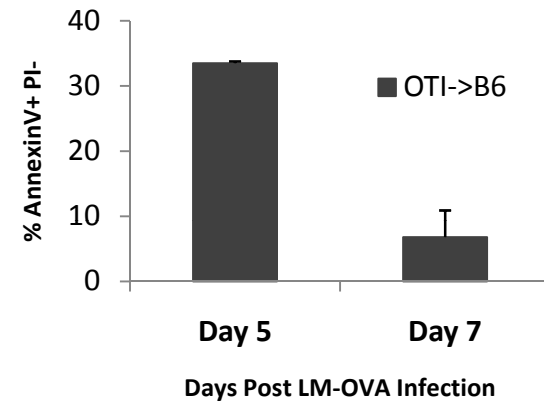

Supplementary Figure 5. TGF- $\beta$  promotes the death of effector CD8<sup>+</sup> T cells in B6 host.

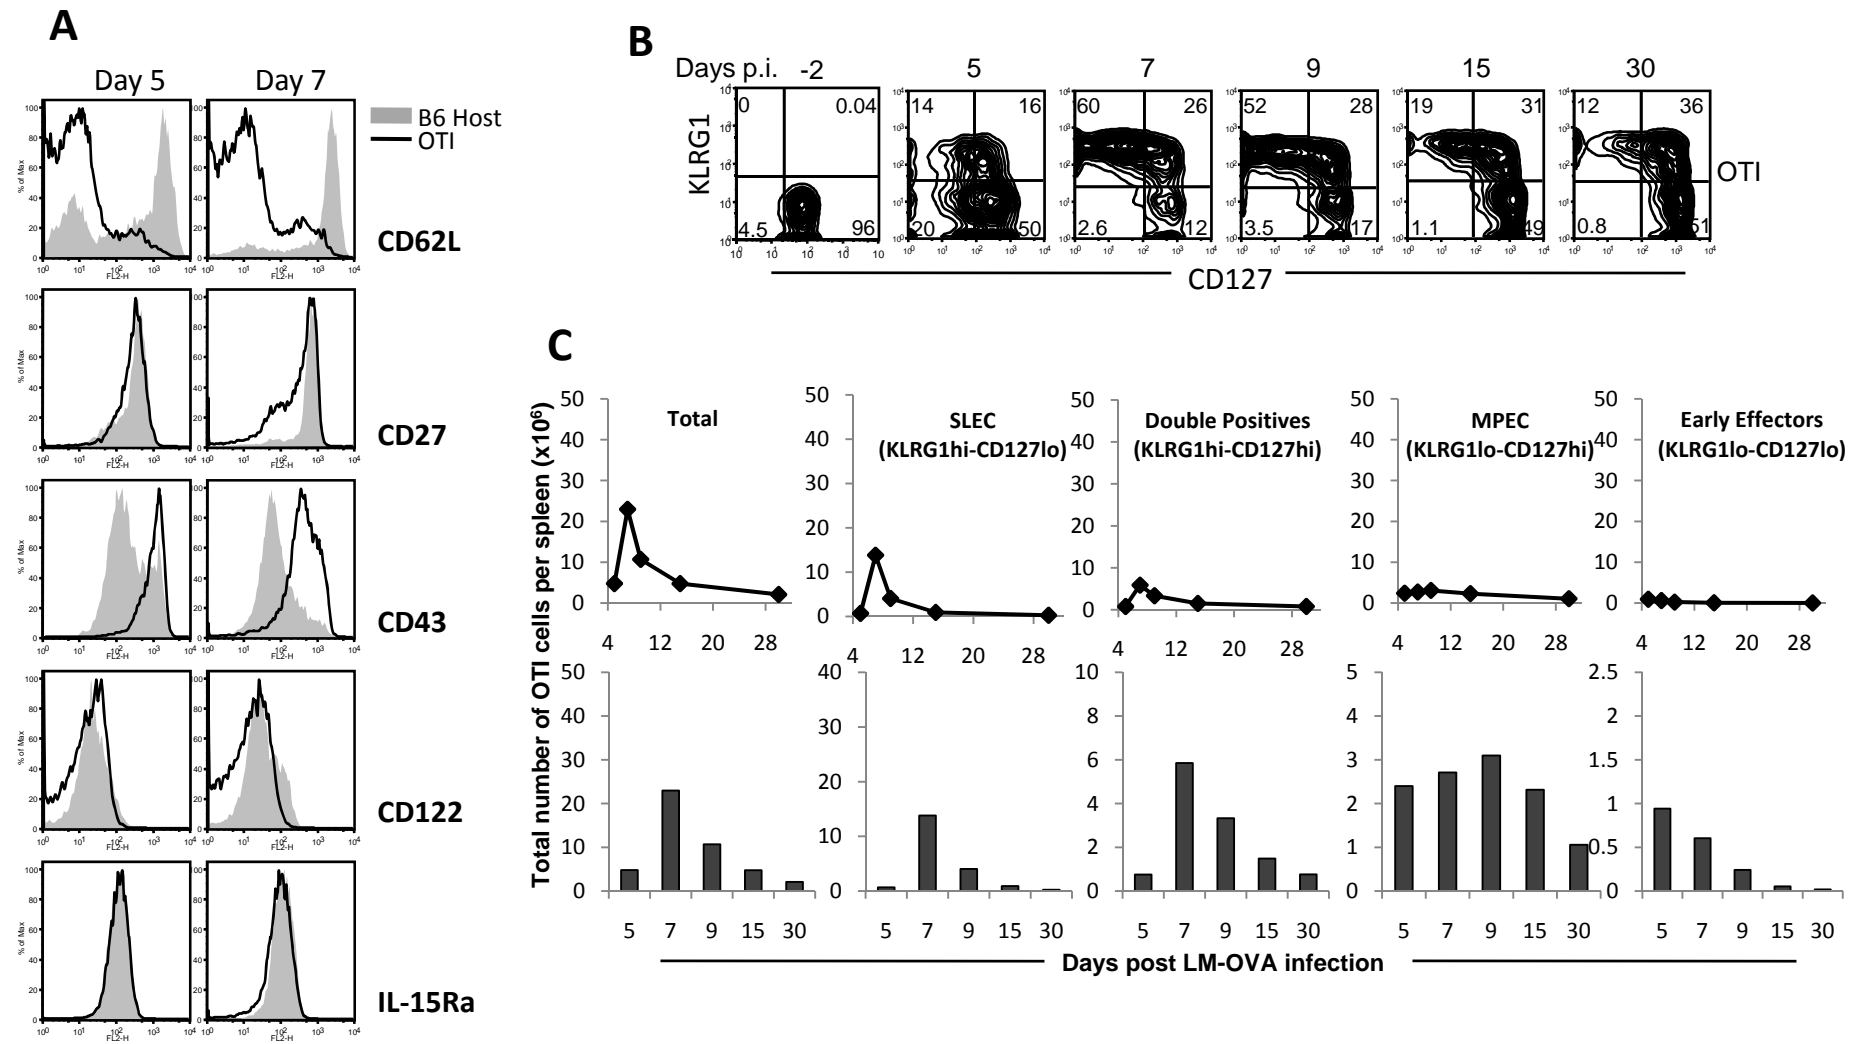

Supplementary Figure 6. Phenotypic analysis of OTI effector cells in B6 host.

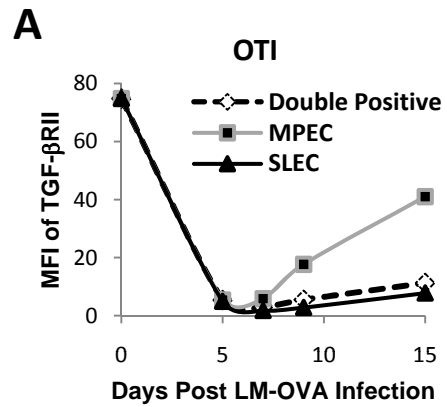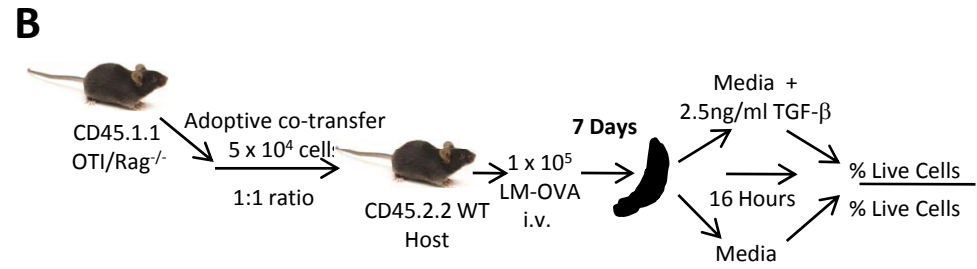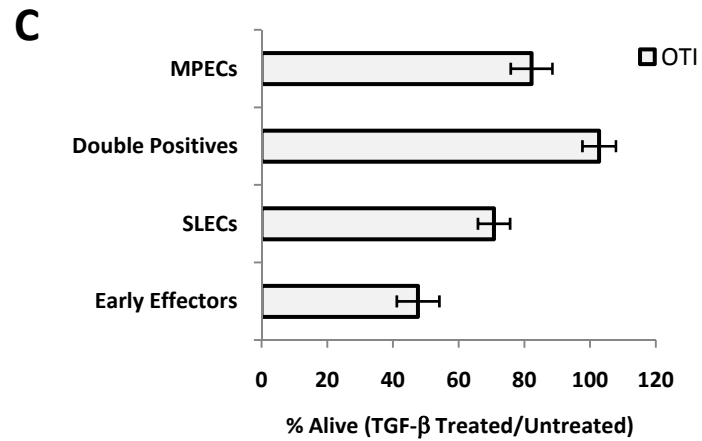

Supplementary Figure 7. TGF-β promotes the apoptosis of effector CD8<sup>+</sup> T cells *ex vivo*.

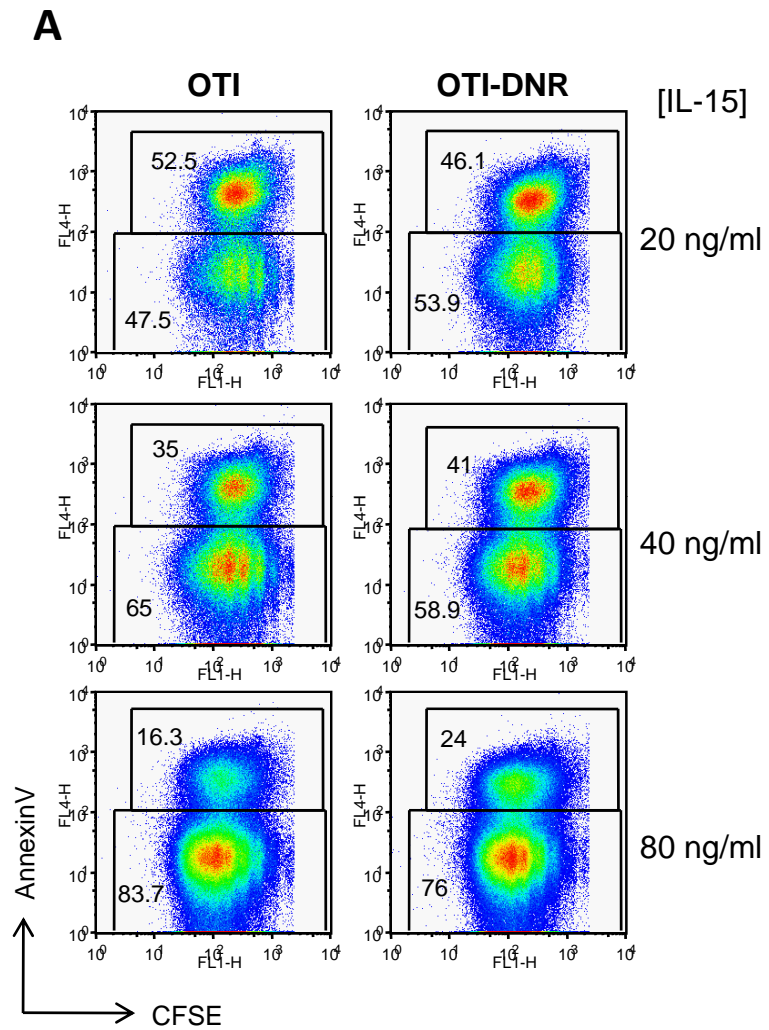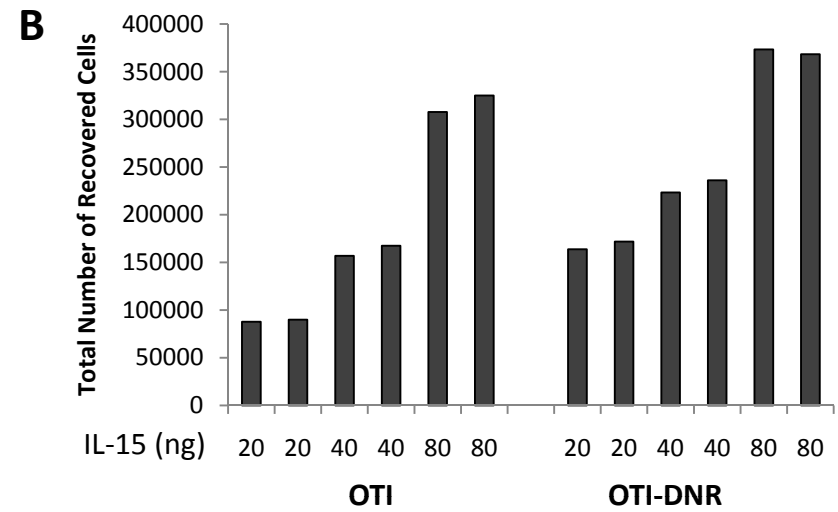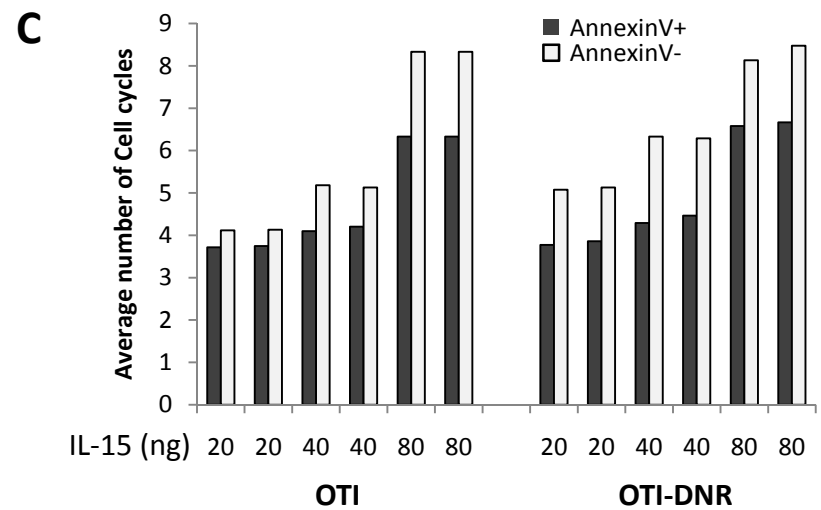

**Supplementary Figure 8. OTI and OTI-DNR cells respond similarly to different concentrations of IL-15.**



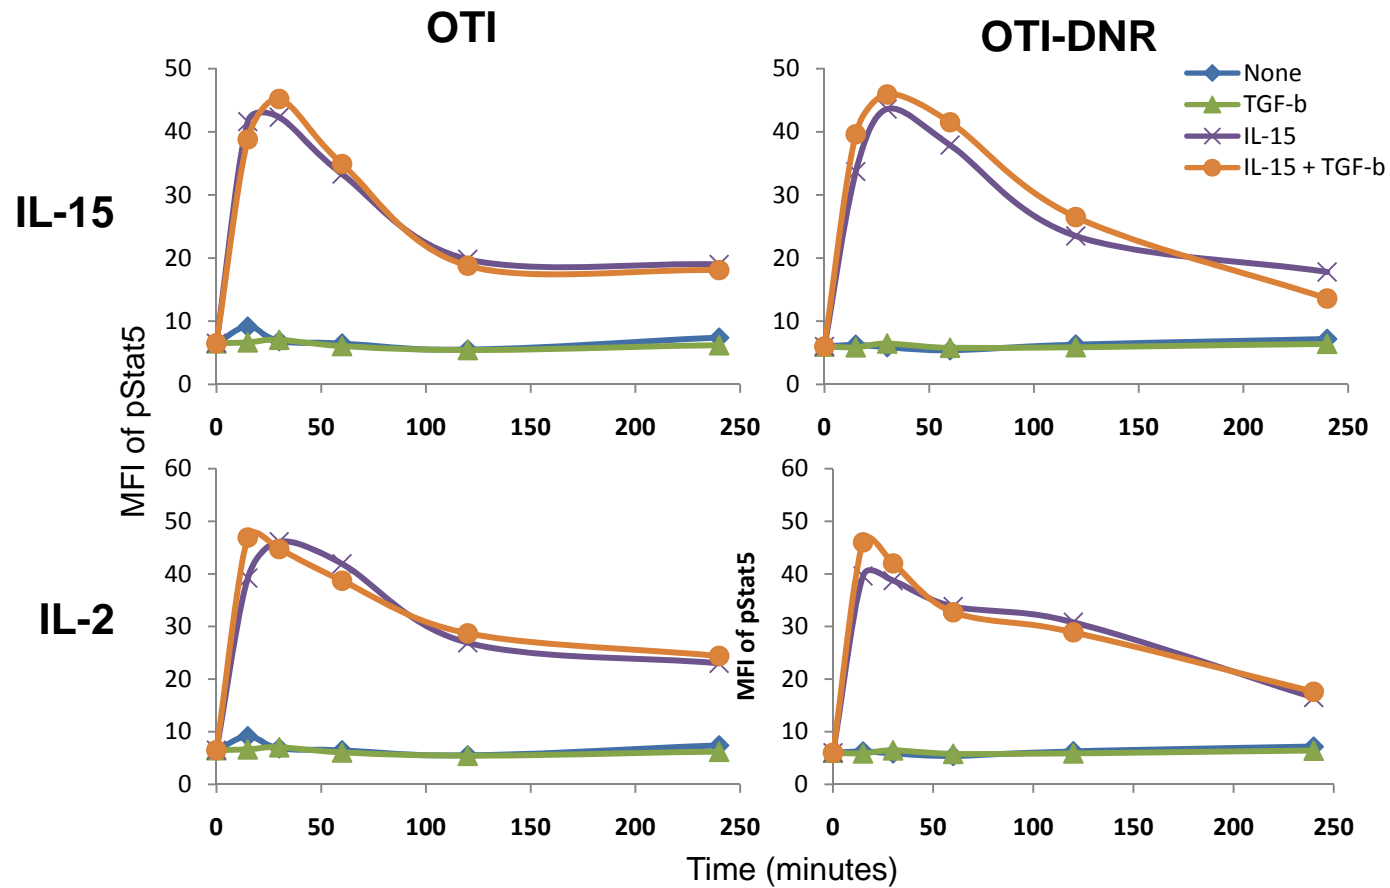

Supplementary Figure 9. OTI and OTI-DNR effector cells show similar phosphorylation and dephosphorylation of Stat5 in response to IL-15 and IL-2.

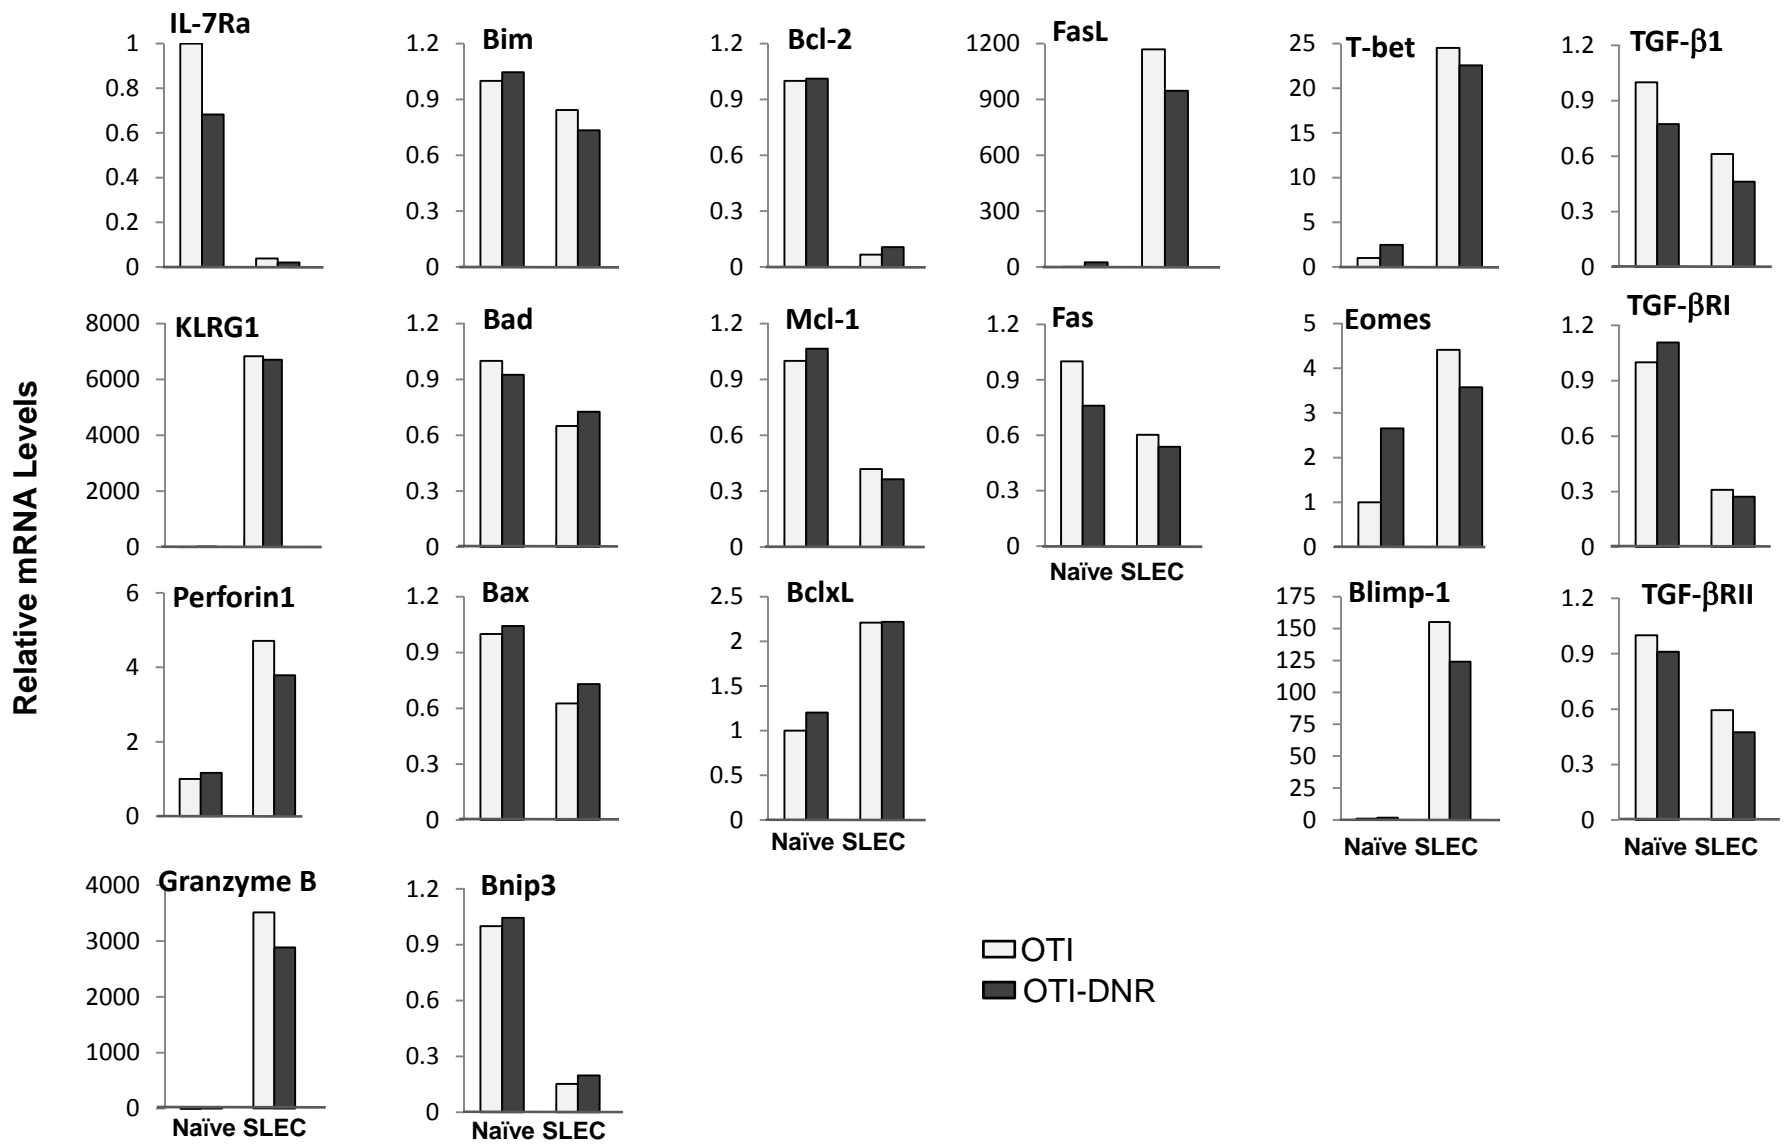

Supplementary Figure 10. Comparison of mRNA levels in naïve and day 7 SLECs.

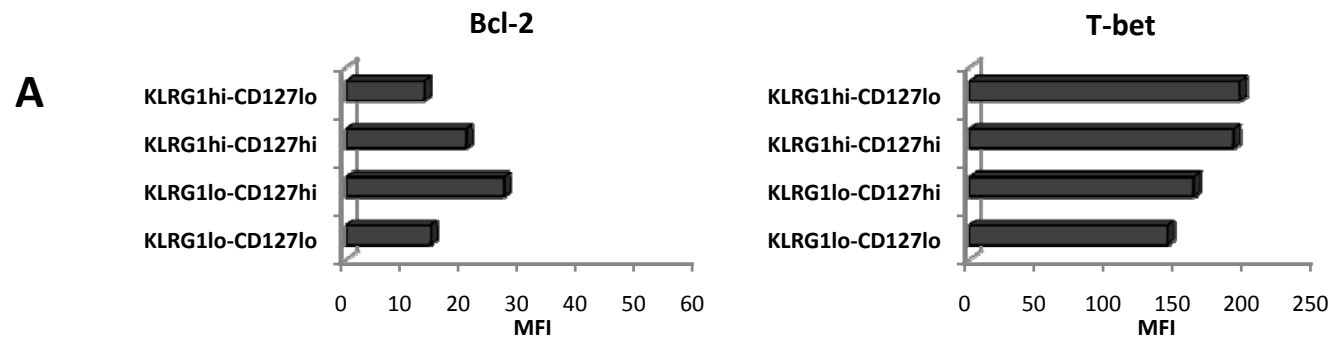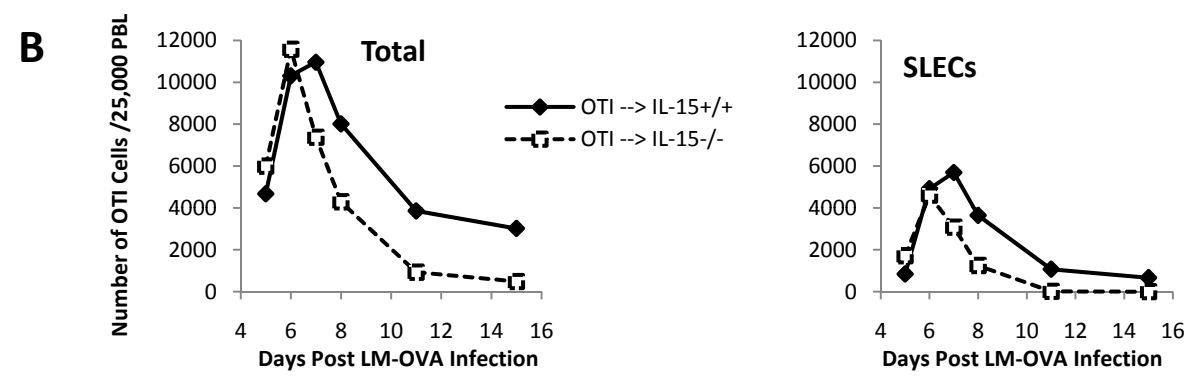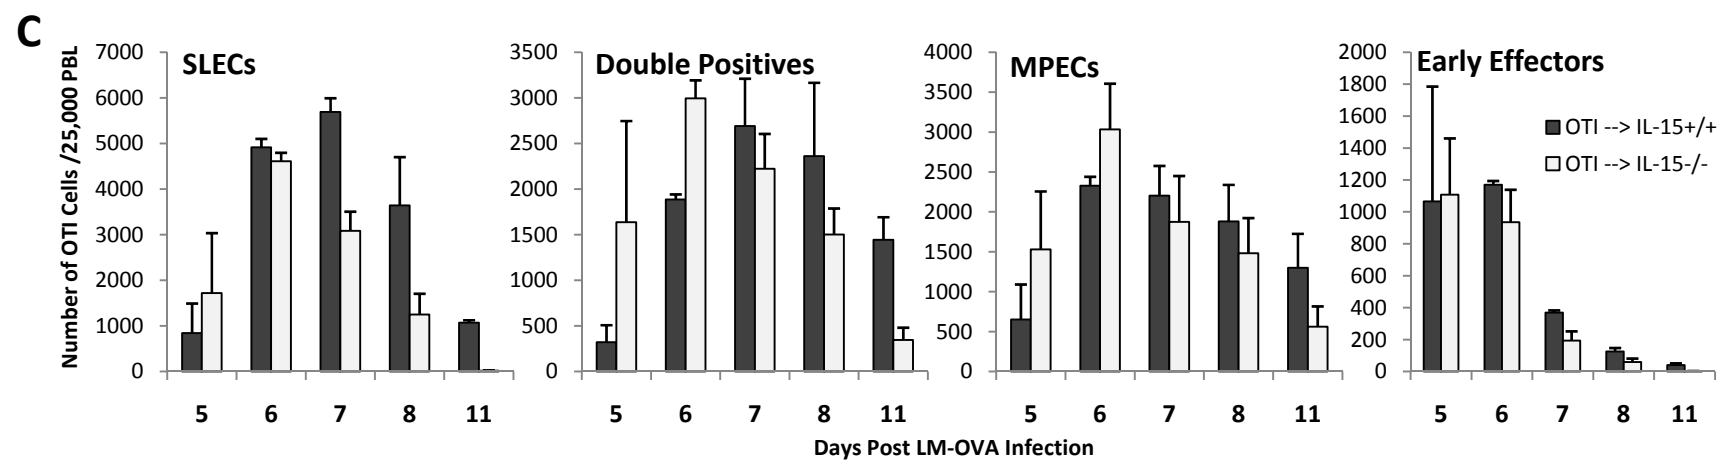

**Supplementary Figure 11. TGF- $\beta$  and IL-15 control the number of SLECs by exerting opposing effects on Bcl-2 levels in CD1c-DNR transgene-negative mice.**

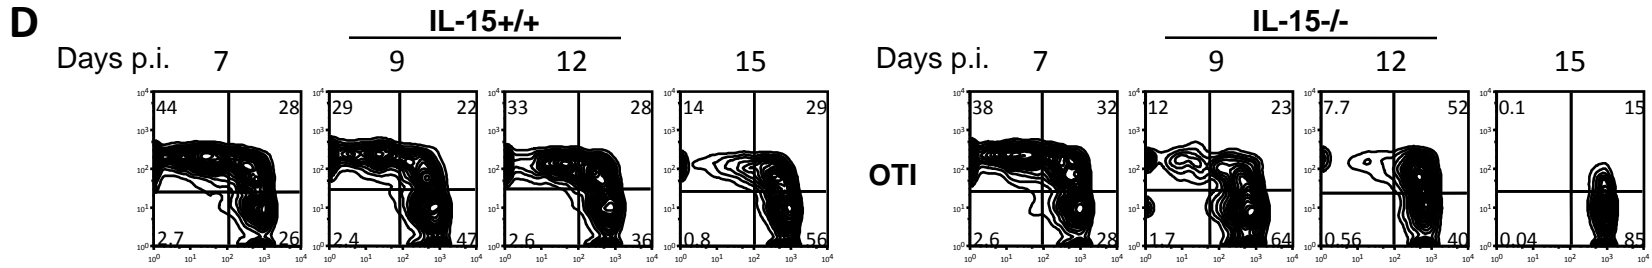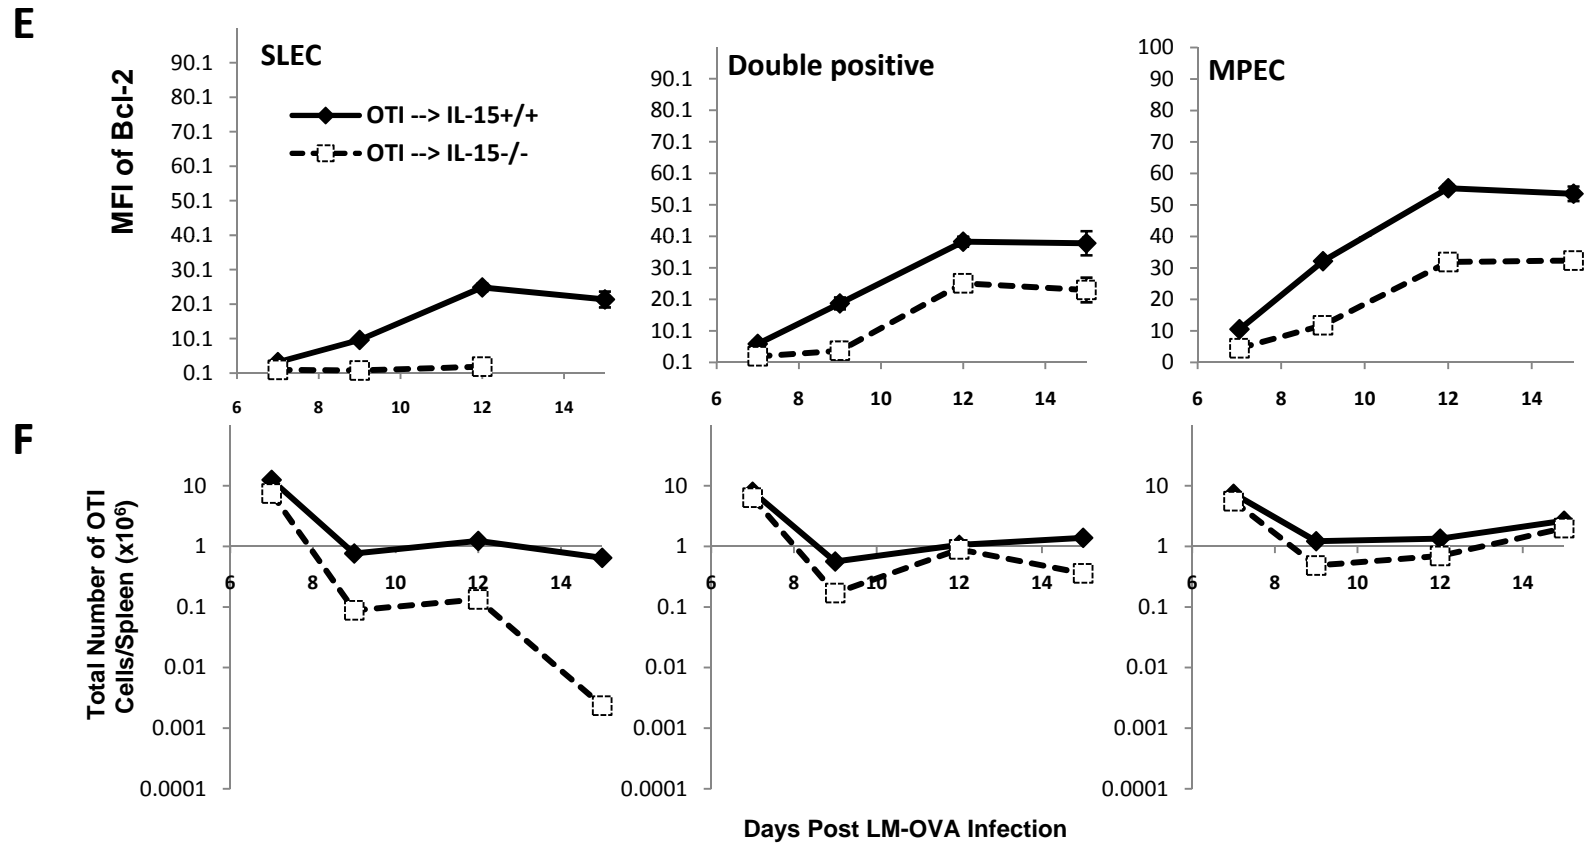

**Supplementary Figure 11 Cont. TGF- $\beta$  and IL-15 control the number of SLECs by exerting opposing effects on Bcl-2 levels in CD11c-DNR transgene-negative mice.**

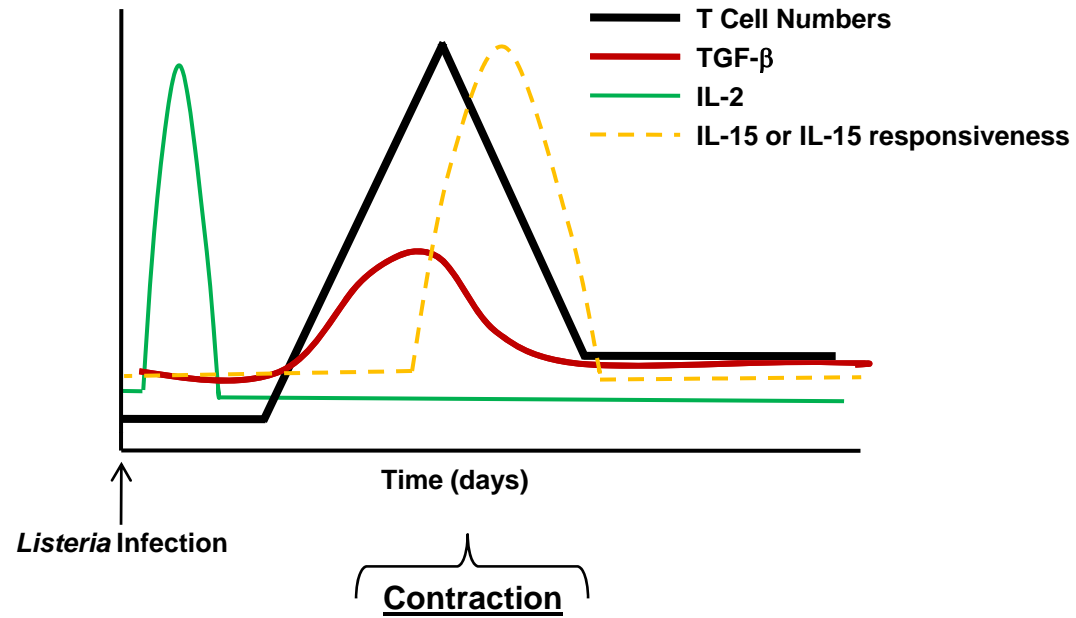

|                               |      |                         |
|-------------------------------|------|-------------------------|
| IL-7 + IL-15 +                | MPEC | +++++Bcl-2 = Survival   |
| TGF- $\beta$ + IL-7 + IL-15 + | MPEC | +++Bcl-2 = Survival     |
| IL-7 +                        | MPEC | ++++Bcl-2 = Survival    |
| TGF- $\beta$ + IL-7 +         | MPEC | ++Bcl-2 = Survival      |
| IL-15 +                       | SLEC | ++Bcl-2 = Delayed Death |
| TGF- $\beta$ + IL-15 +        | SLEC | +Bcl-2 = Eventual Death |
|                               | SLEC | No Bcl-2 = Rapid Death  |
| TGF- $\beta$ +                | SLEC | No Bcl-2 = Rapid Death  |

Supplementary Figure 12. Relationship between *Listeria* infection, *cyc* cytokines, TGF- $\beta$ , Bcl-2 and effector T cell contraction.
